# Supplementary material for: Role of autophagy in cell-penetrating peptide transfection model
Source: PubMed Central journal article supplement (PMC5626743; doi:10.1038/s41598-017-12747-z), 2017-10-03
Supplement: 41598_2017_12747_MOESM1_ESM.pdf [file 41598_2017_12747_MOESM1_ESM.pdf]

## **Role of autophagy in cell-penetrating peptide transfection model**

Moataz Dowaidar<sup>a\*</sup>, Maxime Gestin<sup>a</sup>, Carmine Pasquale Cerrato<sup>a</sup>, Mohammed Hakim Jafferli<sup>a</sup>, Helerin Margus<sup>b,c</sup>, Paula Ann Kivistik<sup>d</sup>, Kariem Ezzat<sup>e</sup>, Einar Hallberg<sup>a</sup>, Margus Pooga<sup>b</sup>, Mattias Hällbrink<sup>a</sup>, and Ülo Langel<sup>a,c\*</sup>

<sup>a</sup>Department of Neurochemistry, The Arrhenius Laboratories for Natural Sciences, Stockholm University, Svante Arrhenius väg 16B, SE-10691 Stockholm, Sweden.

<sup>b</sup>Department of Developmental Biology, Institute of Molecular and Cell Biology, University of Tartu, 23 Riia Street, 51010, Tartu, Estonia

<sup>c</sup>Laboratory of Molecular Biotechnology, Institute of Technology, University of Tartu, Nooruse, 50411 Tartu, Estonia.

<sup>d</sup>Estonian Genome Center, University of Tartu, Tartu, Estonia.

<sup>e</sup>Department of Laboratory Medicine, Karolinska Institutet, Huddinge, Sweden.

\*Corresponding authors at Dpt. Neurochemistry, Stockholm University, S.Arrheniusv. 16B, SE-106 91 Stockholm, Sweden. Moataz Dowaidar, E-mail address: moataz@neurochem.su.se, Ülo Langel, Tel: +46-8-161 793; Fax: +46-8-161 371; E-mail: ulo@neurochem.su.se.

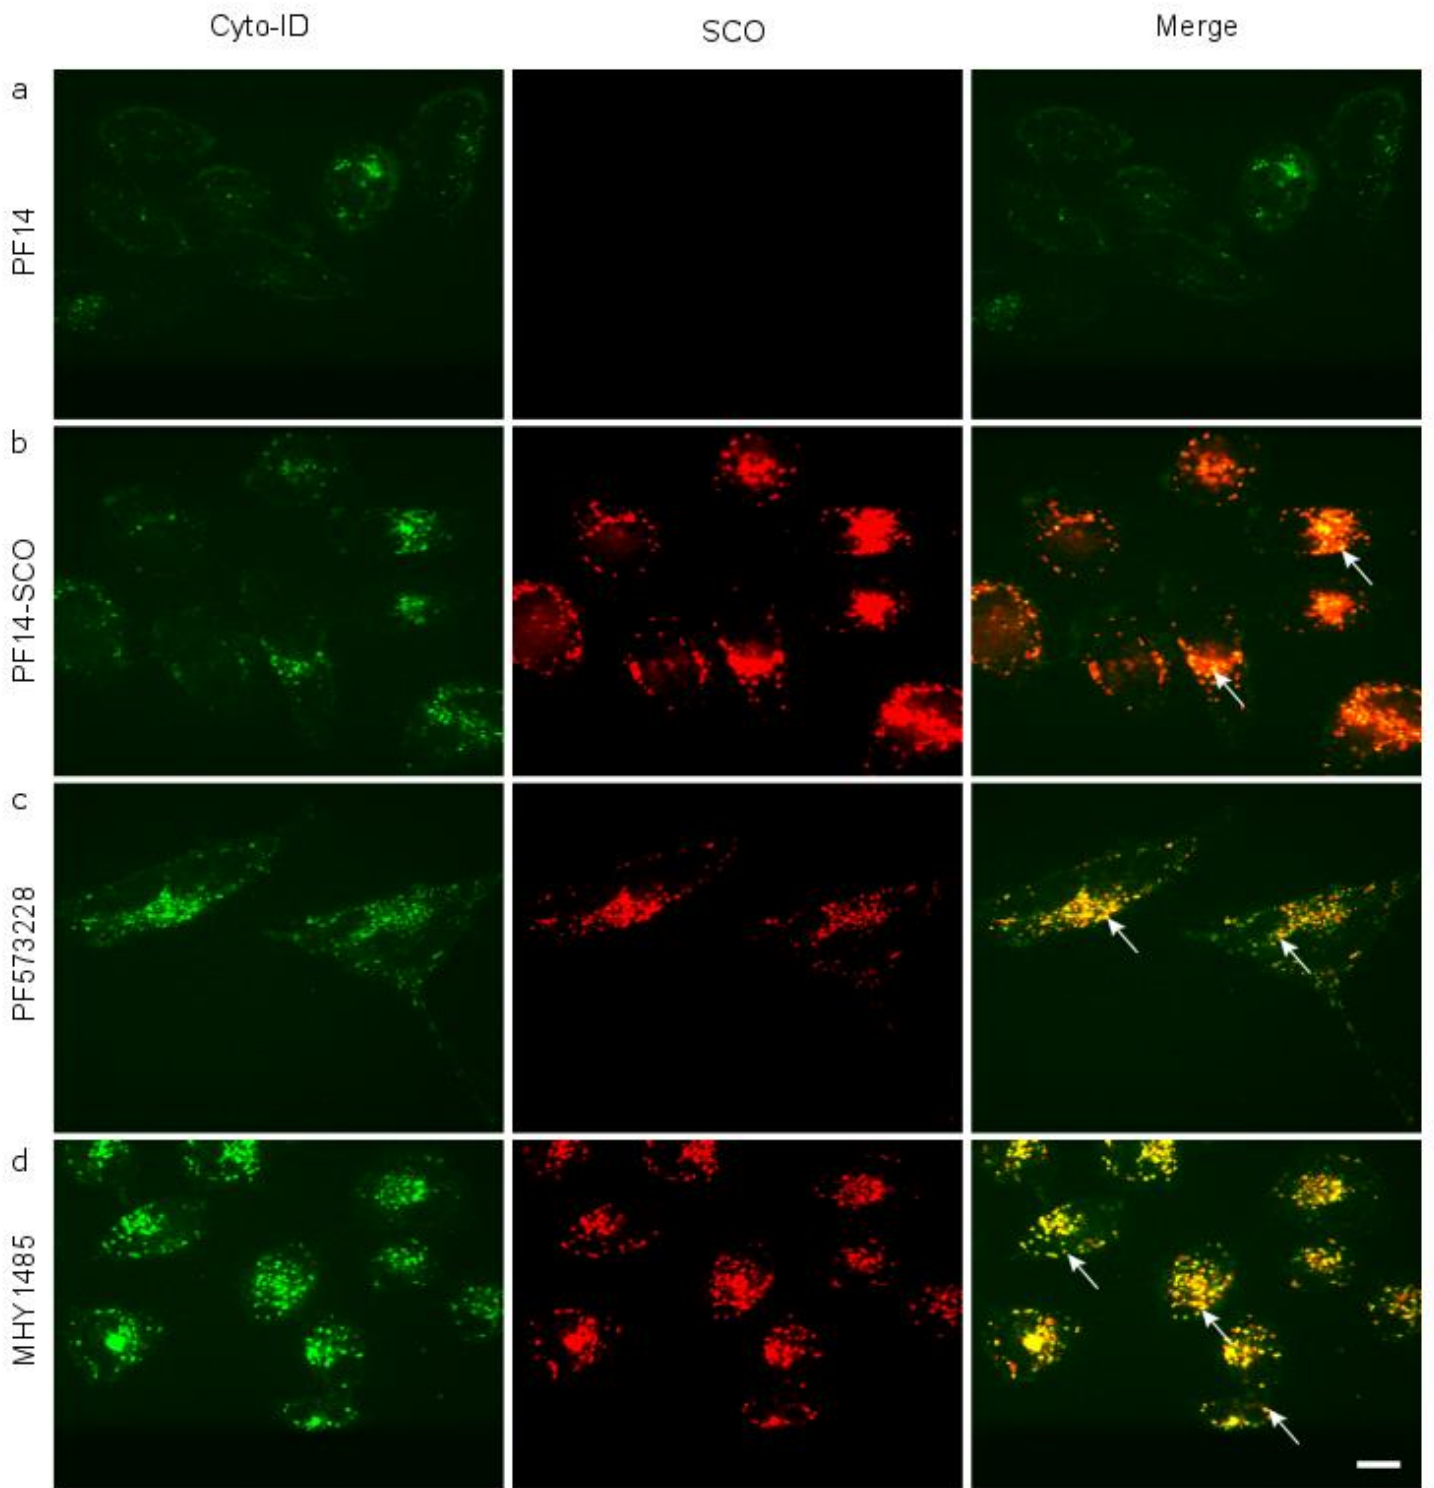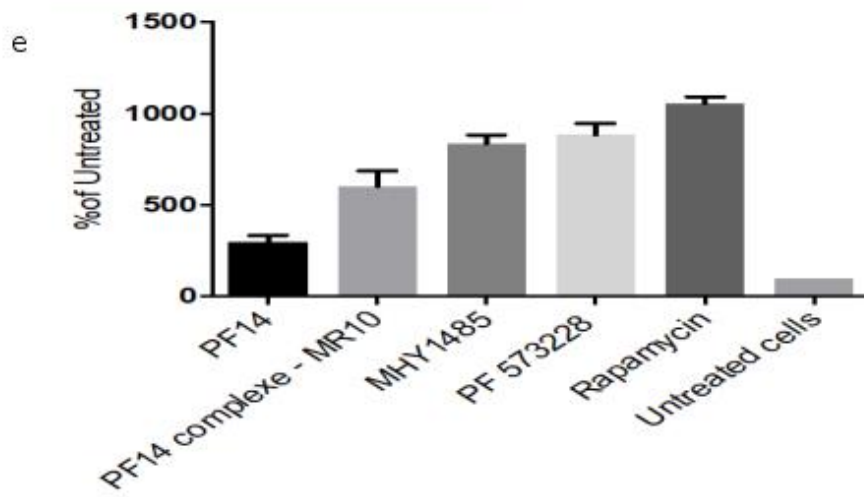

**Supplementary Figure 1: Induction of autophagy by PF14 and its complexes with SCO in HeLa cells using detection by Cyto-ID staining.** Confocal micrographs of HeLa-pLuc705 cells treated with 2  $\mu$ M PF14 (a), PF14-SCO-Alexa 568 nano-complexes (red, formed at molar ratio 10/1) for 24 h (b), and autophagosomes stained with Cyto-ID (green). The cells in c and d were treated before addition of PF14-SCO complexes with (c) 6  $\mu$ M FAK inhibitor (PF573228) or (d) 10 nM mTOR activator (MHY1485) for 1 h. The fluorescence signal intensity levels were adjusted for better visibility. (e) Quantification of Cyto-ID signal from HeLa-705 cells in response to treatment with PF14, its complexes with SCO at MR 10, PF14 complexes with 10 nM mTOR activator (MHY1485) or 6  $\mu$ M focal adhesion kinase (PF573228) inhibitor, Scale bar is 10  $\mu$ m.
